# Supplementary material
Source: Springer Nature journal article supplement (https://www.springermedizin.de/resource/supplementary/12935_2006_163_MOESM2_ESM.pdf/9541216)

**a**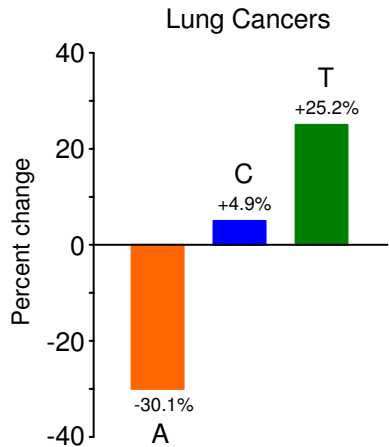**b**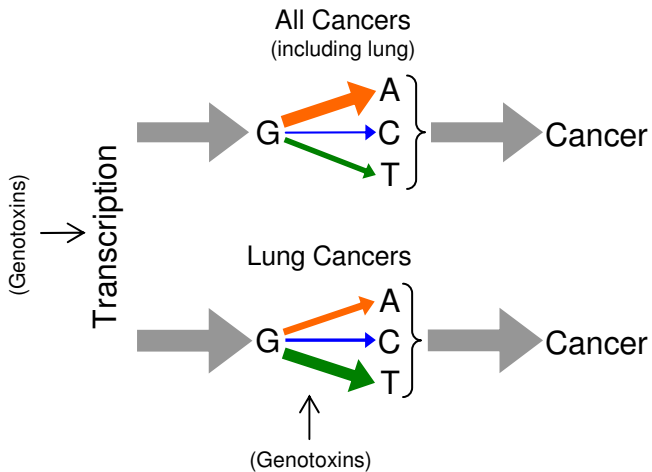

Supplement: MOESM2 [file 9541216]
